# Supplementary material for: Photocatalytic degradation of two different types of dyes by synthesized La/Bi2WO6
Source: Royal Society of Chemistry journal article supplement (doi:10.1039/c6ra17798k), 2016-01-01
Supplement: c6ra17798k1.pdf [file c6ra17798k1.pdf]

## Supplementary Material

# Photocatalytic degradation of two different types of dyes by synthesized La/Bi<sub>2</sub>WO<sub>6</sub>

Chunying Wang<sup>a,b,\*</sup>, Qingjiang Zhu<sup>b</sup>, Chuantao Gu<sup>c</sup>, Xianping Luo<sup>a,b</sup>, Changlin Yu<sup>a</sup>  
and Min Wu<sup>b</sup>

---

<sup>a</sup> Jiangxi Key Laboratory of Mining & Metallurgy Environmental Pollution Control, Jiangxi University of Science and Technology, Ganzhou 341000, China.

<sup>b</sup> Post-doctoral scientific research workstation of Western Mining co., LTD., Xining 810000, China.

<sup>c</sup> School of Chemistry and Chemical Engineering, Xiamen University, Xiamen 361005, China.

\*To whom correspondence should be addressed. Tel.:+86-15083792595. Fax: +86-7978312759;E-mail: [cywang@jxust.edu.cn](mailto:cywang@jxust.edu.cn)

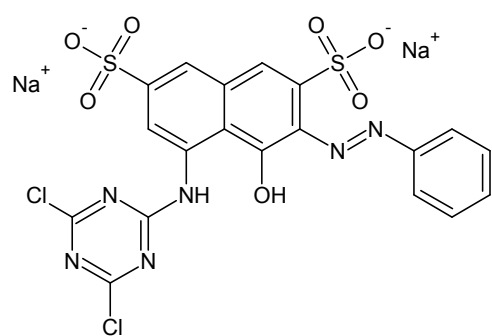

**X-3B**

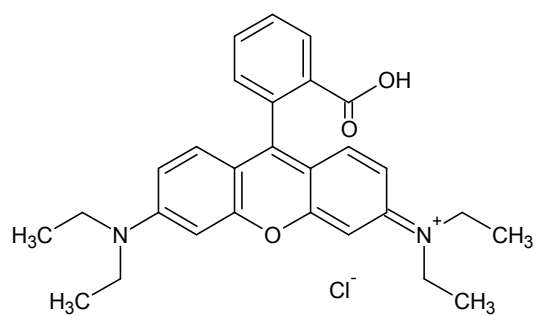

**RhB**

**Fig. S1** Chemical structure of X-3B and RhB

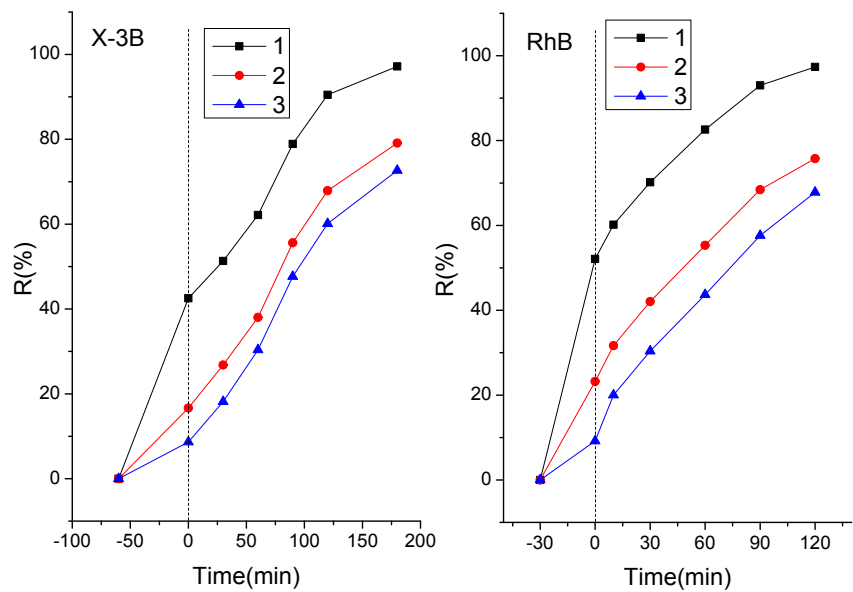

Fig.S2 The recycled performance of La/Bi<sub>2</sub>WO<sub>6</sub> for X-3B and RhB

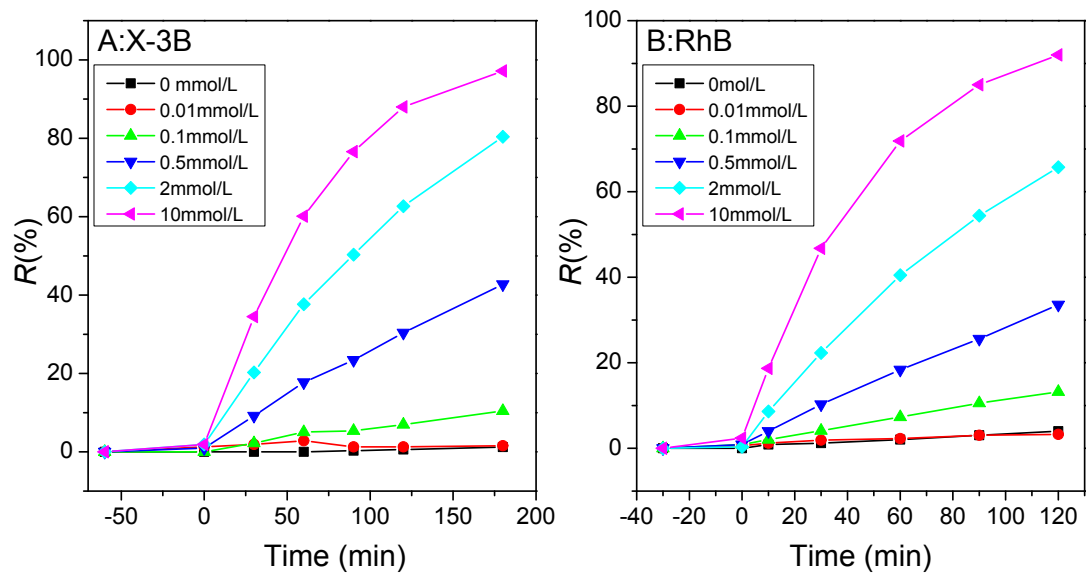

**Fig. S3** Effects of  $\text{H}_2\text{O}_2$  alone on the removal of dyes under simulated solar irradiation

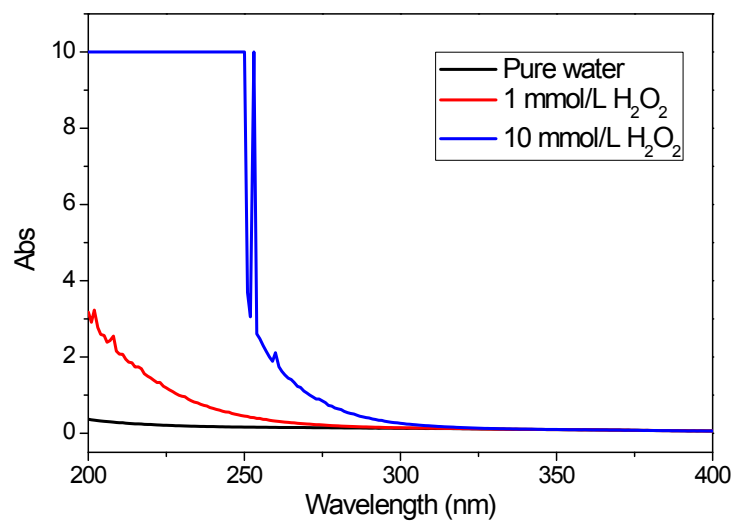

**Fig. S4** Optical absorption spectroscopy of H<sub>2</sub>O<sub>2</sub> solution in the range of 200-400 nm
